## Fluoride Ion Toxicity in Human Kidney Collecting Duct Cells

Marie-Laure Cittanova, M.D.,\* Brigitte Lelongt, Ph.D.,† Marie-Christine Verpont,‡ Monique Géniteau-Legendre,§ Favez Wahbé, M.D.,|| Dominique Prié, M.D.,# Pierre Coriat, M.D.,\*\* Pierre M. Ronco, M.D.††

**Background:** Several halogenated anesthetics induce a urinary concentrating defect, partly related to fluoride ion toxicity in collecting duct cells. The aim of this study was to investigate the effects of fluoride ion in human kidney cells.

**Methods:** Immortalized human collecting duct cells were used. In a first set of experiments, the toxicity threshold concentration was determined by exposing cell cultures for 24 h to increasing concentrations of fluoride ion in the medium: 0, 1, 5, and 10 mM. The second set of experiments was a time-effect study in which cells were exposed to 5 mM fluoride for 2, 6, and 24 h. Assessment of toxicity was based on several endpoints: cell number, protein content, <sup>3</sup>H-leucine incorporation in newly synthesized proteins, extracellularly released lactate dehydrogenase, Na-K-ATPase pump activity, and electron microscope studies.

**Results:** After 24 h of exposure, fluoride ion decreased cell number (−23%,  $P < 0.05$ ), total protein content (−30%,  $P < 0.05$ ), and <sup>3</sup>H-leucine incorporation (−43%,  $P < 0.05$ ) and increased lactate dehydrogenase release (+236%,  $P < 0.05$ ) at a threshold concentration of 5 mM. Fluoride ion also inhibited

Na-K-ATPase activity at 5 mM (−58%,  $P < 0.05$ ). Major morphologic alterations of mitochondria, including crystal formation, were detected from 1 mM fluoride concentration. Time-effect studies showed that, after only 6 h of exposure at 5 mM, fluoride decreased cell number (−13%,  $P < 0.05$ ), <sup>3</sup>H-leucine incorporation (−48%,  $P < 0.05$ ), and Na-K-ATPase activity (−20%,  $P < 0.05$ ) and increased lactate dehydrogenase release (+145%,  $P < 0.05$ ). Crystal deposits in mitochondria again were a more sensitive marker of cell injury, detectable after only 2 h of exposure.

**Conclusions:** These results suggest that the mitochondrion is a target of fluoride toxicity in human collecting duct cells, and its alteration is partly responsible for the sodium and water disturbances observed in patients. (Key words: Ions: fluoride. Kidney, collecting duct: toxicity.)

SEVERAL halogenated agents, such as methoxyflurane, enflurane, and perhaps sevoflurane, can induce dose-related renal dysfunction, characterized by polyuria due to impaired urine-concentrating ability.<sup>1-6</sup> Methoxyflurane, enflurane, and sevoflurane are known to be metabolized into inorganic fluoride. It is well established that inorganic fluoride ion is responsible for the renal dysfunction occurring with fluorinated anesthetics.<sup>1,7-10</sup> In the distal nephron, two sites play a role in the urine concentrating mechanism: the ascending limb of the Henle's loop and the collecting duct. Functional impairment of either of these two tubule segments may inhibit the urine concentrating mechanism. Renal-tissue solute concentration studies have shown that medullary sodium concentration is reduced by fluoride infusion,<sup>11</sup> indicating that fluoride could be toxic in the ascending limb of Henle's loop.<sup>11,12</sup> On the other hand, the decreased response to exogenous vasopressin injection, at least in some patients,<sup>2-4</sup> suggests that the collecting duct could be the target of toxicity. Fluoride may render the collecting duct unresponsive to vasopressin.<sup>8,13-15</sup> This anti-diuretic hormone acts mainly *via* the cAMP generation, which induces shuttling of water channels between the apical and basolateral poles of collecting duct principal cells. Wallin and Kaplan established that fluoride ion

\* Assistant, Département d'Anesthésie-Réanimation, Hôpital Pitié-Salpêtrière, Paris.

† Chargée de Recherche, INSERM U 64, Hôpital Tenon, Paris.

‡ Technicien, INSERM U 64, Hôpital Tenon, Paris.

§ Maître de conférences, Faculté de Pharmacie, Chatenay-Malabry.

|| Assistant, Laboratoire d'Explorations Fonctionnelles, Hôpital Tenon, Paris.

# Assistant, Laboratoire d'Explorations Fonctionnelles, Hôpital Bichat, Paris.

\*\* Professeur d'Anesthésiologie, Chef de service, Département d'Anesthésie-Réanimation, Hôpital Pitié-Salpêtrière, Paris.

†† Professeur de Néphrologie, Chef de service, Hôpital Tenon, Paris.

Received from Département d'Anesthésie-Réanimation, Groupe Hospitalier Pitié-Salpêtrière, and Département de Néphrologie and Institut National de la Santé et de la Recherche Médicale, unité 64, Hôpital Tenon, Université Paris VI, Paris, France. Submitted for publication February 16, 1995. Accepted for publication October 30, 1995. Supported in part by INSERM. Dr. Cittanova was the recipient of a fellowship grant from INSERM.

Address reprint requests to Dr. Cittanova: Département d'Anesthésie-Réanimation, Groupe hospitalier Pitié-Salpêtrière, 47 boulevard de l'Hôpital, 75651 Paris Cedex 13, France.

could decrease vaso-  
thus inhibiting water  
Studies on the cell  
toxicity have been  
models using cells of  
of the availability of  
talized human cell  
laboratory<sup>16</sup> to analyze  
human collecting duct  
K-ATPase activity and  
after fluoride exposure

### Materials and Methods

#### Cell Culture

The human collecting duct cells were prepared from a cell preparation of a kidney that had been transplanted in a rat. Cells were isolated by using a plasmid containing a neomycin resistance gene and cloned twice. The cells were grown in more than 50 passages. The principal cells of the collecting duct include specific horizontal cells. In particular, a marked increase in cell number was observed after incubation with arginine vasopressin. A specific antigen located on the cell and the expression of a water channel<sup>17</sup> was observed in the renal proximal tubule cells. The thick ascending limb of the Henle's loop was excluded. Cells were cultured in 96 well trays (Costar, Cambridge, MA) in an atmosphere of 5% CO<sub>2</sub>. The culture medium was composed of modified Eagle's medium (Gibco, Paisley, Scotland) supplemented with 10 µg·ml<sup>-1</sup> transferrin, 5·10<sup>-8</sup> M dexamethasone (Sigma), and 20 mM HEPES (Sigma), to which 2% fetal calf serum was added. The medium was changed every other day.

## Valenti I: Personal communication

## FLUORIDE ION TOXICITY IN KIDNEY CELLS

could decrease vasopressin-induced cAMP generation, thus inhibiting water reabsorption.<sup>14</sup>

Studies on the cellular mechanisms of fluoride cytotoxicity have been hampered by a lack of *in vitro* models using cells of human origin. We took advantage of the availability of a simian-virus-40 (SV40)-immortalized human cell line recently established in our laboratory<sup>16</sup> to analyze the effects of fluoride ion in the human collecting duct. In particular, we studied Na-K-ATPase activity and morphologic changes occurring after fluoride exposure.

### Materials and Methods

#### Cell Culture

The human collecting duct cell line was established from a cell preparation from the nontumorous part of a kidney that had been removed for a localized carcinoma. Cells were immortalized by transfection with a plasmid containing a defective SV40 virus genome<sup>17,18</sup> and cloned twice. The resulting cell line has retained, in more than 50 passages, the main characteristics of the principal cells of the human collecting duct. These include specific hormonal responsiveness and, in particular, a marked increase in cAMP content after incubation with arginine-vasopressin, the expression of a specific antigen localized at the basolateral side of the cell and the expression of principal cell-specific water channels.<sup>##</sup> Moreover, neither the antigens in the renal proximal tubule nor the Tamm-Horsfall protein, which is exclusively synthesized *in vivo* in the thick ascending limb of Henle's loop, were expressed.

Cells were cultured to subconfluency in 6- or 12-well trays (Costar, Cambridge, MA) for 6 days, at 37°C, in an atmosphere containing 20% O<sub>2</sub>, 75% N<sub>2</sub>, and 5% CO<sub>2</sub>. The culture medium was a hormonally defined medium composed equally (vol/vol) of Dulbecco's modified Eagle medium and Nutrient mixture F12 (Gibco, Paisley, Scotland) supplemented with 5 µg · ml<sup>-1</sup> transferrin (Sigma, St. Louis, MO), 30 nM sodium selenate (Sigma), 2 mM glutamine (Sigma), 5 · 10<sup>-8</sup> M dexamethasone (Sigma), 5 µg · ml<sup>-1</sup> insulin (Sigma), and 20 mM Hepes (Gibco BRL, Cergy Pontoise, France), to which 2% newborn calf serum (Gibco BRL) was added. The medium pH was 7.4. The medium was changed every other day. Toxicity studies were per-

formed after 7 days of culture. For the final 2, 6, and 24 h, the medium was replaced with a fresh medium containing or not containing sodium fluoride (Sigma).

#### Experimental Protocol

In a first set of experiments, the toxicity threshold was determined by incubating the cells with increasing concentrations of sodium fluoride for 24 h. Parameters of cell viability, Na-K-ATPase activity, and cell ultrastructure were assessed at three concentrations of fluoride: 1, 5, and 10 mM plus control (0 mM).

To analyze the sequence of events involved in fluoride ion toxicity to this cell population, a time-effect study was performed at 5-mM fluoride ion concentration. This concentration was chosen because, in the first set of experiments, it was the lowest concentration responsible for both mitochondrial alterations and impairment of cell viability parameters and Na-K-ATPase activity. Four durations of exposure were tested: 2, 6, and 24 h plus control (time 0).

#### Evaluation of Fluoride Toxicity on Cell Viability

The cell number was evaluated by counting in a Malassez cell. Cell damage was assessed by measuring extracellular lactate dehydrogenase (LDH) activity, which is a sensitive tool in detecting nonspecific cell damage.<sup>19</sup> LDH activity was determined using an enzymatic rate method with a Synchron Cx5 (Beckman, Brea, CA), with an analytic range of 20–2,500 IU · l<sup>-1</sup> and precision (SD) of 15 IU · l<sup>-1</sup>.

Cell protein content was measured under every experimental condition. After removing the medium, the wells were washed with phosphate buffer saline. The cells were dissolved in 1 ml NaOH solution (1 M), 20 µl of which was compared to standards according to manufacturer's instructions (Pierce, Rockford, IL) to evaluate protein concentration by spectrophotometric determination.

Protein synthesis was measured by the incorporation of <sup>3</sup>H-leucine (Amersham, Les Ulis, France). Cells grown in six-well trays were incubated with 10 µCi <sup>3</sup>H-leucine for 5 min. The medium was removed quickly, and the wells were washed three times with 2 ml of ice-cold phosphate buffer saline. Cells were dissolved in 2 ml of NaOH solution (1 M), and 1 ml was recovered for counting (liquid scintillation counter LKB, Les Ulis, France). Values were expressed in counts · min<sup>-1</sup> · mg protein<sup>-1</sup>.

## Valenti I: Personal communication. 1995.



### Evaluation of Na-K-ATPase Activity

One of the main characteristics of the collecting duct is its intense water and sodium chloride transport. Sodium reabsorption is driven by the Na-K-ATPase pump, located at the basolateral side of the cell, which decreases intracellular sodium concentration and thus secondarily activates the inwardly directed sodium channel located in the luminal domain. Na-K-ATPase also induces a potassium influx into the cell and is thus responsible for the maintenance of high potassium cell concentration. Ouabain selectively inhibits the Na-K-ATPase pump<sup>20,21</sup> and, consequently, sodium reabsorption in collecting ducts. Na-K-ATPase activity was assessed by measuring rubidium cell influx (<sup>86</sup>RbCl, Amersham) in the presence or absence of ouabain. Rubidium was used as a tracer of potassium influx because of its high affinity to the potassium binding site on the pump. Na-K-ATPase activity was determined as the ouabain-sensitive rubidium influx (*i.e.*, the part of influx inhibited by ouabain).<sup>22</sup>

Experiments were carried out on cells grown in 12-well trays. The cells were washed three times with the incubation buffer (NaCl 140 mM, KCl 5.5 mM, Hepes 15 mM) prewarmed to 37°C. pH was adjusted to 7.40 with small aliquots of NaOH solution. Cells were incubated for 5 min with 1 ml/well of incubation buffer containing 1  $\mu$ Ci  $\cdot$  ml<sup>-1</sup> rubidium, in the presence or absence of ouabain (1 mM; Sigma). At the end of the incubation period, the medium was removed quickly, and the wells were washed three times with 1 ml of ice-cold saline (9 g  $\cdot$  l<sup>-1</sup>). The cells were dissolved in 500  $\mu$ l of NaOH solution (1 mM), and 400  $\mu$ l was recovered for counting (liquid scintillation counter LKB). Values were expressed in nm  $\cdot$  mg protein<sup>-1</sup>  $\cdot$  5 min<sup>-1</sup>.

### Electron Microscope Studies

Cells grown in plastic Petri dishes and exposed or not to fluoride ion as described above were fixed in glutaraldehyde diluted in a 0.1-M sodium cacodylate buffer, pH 7.4, for 3 h at 4°C. They were postfixed in 1% osmium, dehydrated in a grade series of ethanols, infiltrated, and embedded in Epon 812. Ultrathin sections of confluent monolayers were cut transversally, counterstained with uranylacetate and lead citrate, and viewed under an EM 109 Zeiss electron microscope. Three concentration-effect and two time-effect experiments were analyzed, and a total of 43–109 cells were examined in each experimental condition.

### Statistical Analysis

Three to five experiments were carried out in triplicate at each concentration and each time tested for the evaluation of cell toxicity parameters and Na-K-ATPase activity ( $n = 9-12$ ). Data are expressed as mean  $\pm$  SD. Comparison of several means was performed using analysis of variance and Neuman-Keuls test.

Comparison of percentages was performed using Fisher's exact test with the Bonferroni correction. All *P* values were two-tailed. A *P* value less than 0.05 was necessary to reject the null hypothesis. Statistical analysis was performed on a computer using PCSM software (Deltasoft, Meylan, France).

## Results

### Concentration-Effect Study

#### Viability Parameters and Na-K-ATPase Activity.

At the least concentration tested (1 mM), fluoride ions failed to alter any parameter of cell injury and Na-K-ATPase pump (table 1). At greater concentrations (5 and 10 mM), fluoride ions induced dramatic concentration-dependent changes in extracellular LDH release, which were accompanied by a parallel and significant decrease in the cell number and protein content per well. Fluoride ions also reduced protein synthesis (assessed by <sup>3</sup>H-leucine incorporation) to 43% (5 mM) and 13% (10 mM) of control values. As the other biologic parameters studied, Na-K-ATPase (table 1) was lower at 5 and 10 mM fluoride (41% and 39% of mean control value, respectively).

**Ultrastructural Effects.** Electron microscope studies showed that collecting duct cells grown in control conditions formed an epithelial sheet, with normal appearance of mitochondria (fig. 1A). After 24 h of exposure with 1 mM fluoride ions, major alterations in mitochondria were visible (fig. 1B). In 16 of 67 cells, mitochondria contained crystal structures, with minor disorganization of the crests. Eight-one percent of 43 cells at 5 mM (fig. 1C) and all 70 cells examined at 10 mM (fig. 1D) showed crystal formations in mitochondria. Furthermore, crystals increased in frequency, size, and density in a concentration-dependent manner (figs. 1B–D and table 2). Swelling of mitochondria was also observed from 1 mM (fig. 1B).

### Time-Effect Study

#### Viability Parameters and Na-K-ATPase Activity.

After 2 h of exposure to 5 mM fluoride, no impairment

Table 1. Fluoride Toxic

|                                                                                                        |
|--------------------------------------------------------------------------------------------------------|
| Cell number (% of control)                                                                             |
| Protein content (mg/well)                                                                              |
| LDH activity (IU $\cdot$ l <sup>-1</sup> )                                                             |
| <sup>3</sup> H-Leucine incorporation (cpm $\cdot$ min <sup>-1</sup> $\cdot$ mg protein <sup>-1</sup> ) |
| Na-K-ATPase (nmol $\cdot$ 5 min <sup>-1</sup> $\cdot$ mg <sup>-1</sup> )                               |

Values are the mean  $\pm$  SD of  
\* *P* < 0.05 versus control value

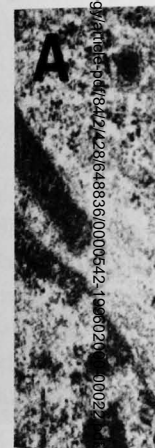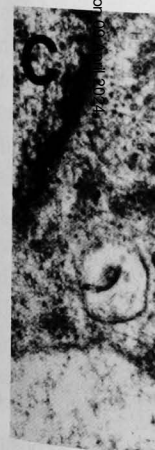

Fig. 1. Electron micrographs of mitochondria in the presence of fluoride. In the presence of fluoride, mitochondria had a normal appearance (A) or almost complete disappearance (B).

## FLUORIDE ION TOXICITY IN KIDNEY CELLS

Table 1. Fluoride Toxicity in Collecting Duct Cells: Concentration Effect

|                                                                                                                 | Fluoride Concentration (mM) (24 h exposure) |             |              |              |
|-----------------------------------------------------------------------------------------------------------------|---------------------------------------------|-------------|--------------|--------------|
|                                                                                                                 | 0                                           | 1           | 5            | 10           |
| Cell number (% of control)                                                                                      | 100                                         | 98 ± 17     | 77 ± 20*     | 47 ± 14*     |
| Protein content (mg/well)                                                                                       | 1.05 ± 0.10                                 | 0.95 ± 0.15 | 0.70 ± 0.20* | 0.45 ± 0.15* |
| LDH activity (IU · l <sup>-1</sup> )                                                                            | 44 ± 3                                      | 46 ± 8      | 148 ± 25*    | 230 ± 24*    |
| <sup>3</sup> H-Leucine incorporation<br>(cpm · min <sup>-1</sup> · mg protein <sup>-1</sup> × 10 <sup>3</sup> ) | 53 ± 10                                     | 69 ± 14*    | 30 ± 7*      | 7 ± 3*       |
| Na-K-ATPase<br>(nmol · 5 min <sup>-1</sup> · mg <sup>-1</sup> )                                                 | 147 ± 20                                    | 174 ± 73    | 61 ± 9*      | 57 ± 12*     |

Values are the mean ± SD of four experiments performed in triplicate (n = 12).

\* *P* < 0.05 versus control values.

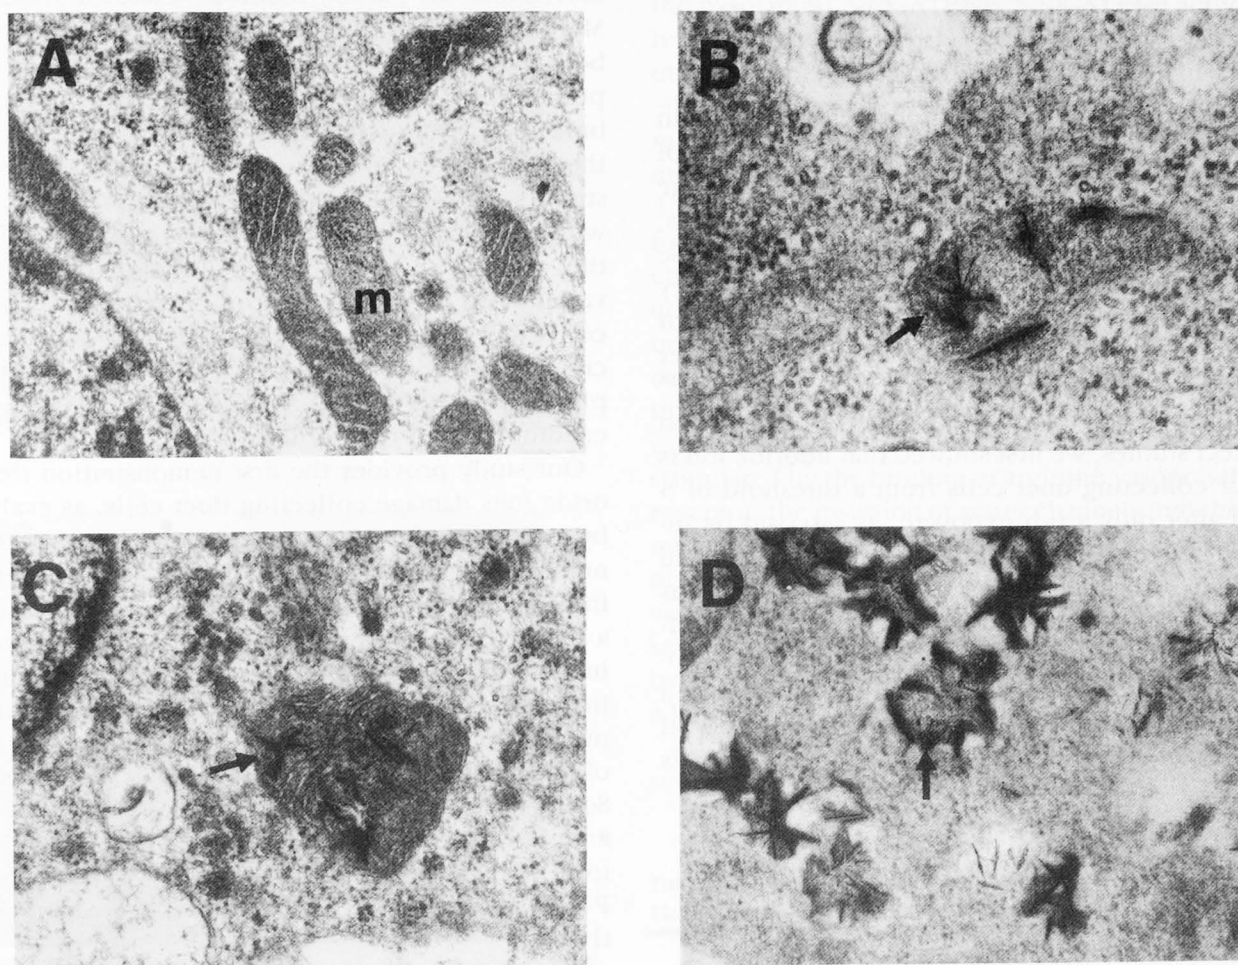

Fig. 1. Electron micrographs of mitochondria (m) in cells grown in the absence (A) or presence of 1 (B), 5 (C), or 10 mM (D) fluoride. In the presence of fluoride ion, crystals (arrows) were localized within mitochondria (B and C), whereas in its absence, mitochondria had a normal appearance (A). Note the increase in size and density of crystals at 10 mM (D), which resulted in almost complete disappearance of mitochondria structure (D). Magnification 5,000×.



of cell viability parameters and Na-K-ATPase pump was detected (table 3). After 6 h, fluoride ion was responsible for an increasing LDH release, decreasing cell number and  $^3\text{H}$ -leucine incorporation (table 3). Like the other biologic parameters studied, Na-K-ATPase pump activity was not modified after a 2-h exposure but was lower after 6 and 24 h (80% and 46% of control group, respectively).

**Ultrastructural Effects.** At 5 mM fluoride concentration, crystals were detected after 2 h of exposure in only 14 of 109 cells (fig. 2A and table 4). In 22 other cells, after 2 h, minor alterations were observed, including disorganization of the crests and swelling (fig. 2B). Thus, 33% of the whole cell population contained damaged mitochondria after 2 h at 5 mM.

After 6 h of exposure, most of the cells (43 of 61) contained mitochondria with crystal formations (table 4).

## Discussion

In this study, we investigated fluoride ion toxicity in human kidney collecting duct cells. Pure culture of these cells requires the microdissection of a large number of collecting ducts from fresh human kidneys, which is an almost impossible task. To circumvent these difficulties, we used an immortalized human kidney collecting duct cell line exhibiting major features of collecting duct principal cells, responsible for water and sodium reabsorption in this renal tubule segment.<sup>16</sup> Using this cell material in concentration-effect and time-effect studies, we first showed that fluoride ion is toxic for collecting duct cells from a threshold of 5 mM and after only a 6-h exposure, as assessed by increased LDH release and decreased cell number and  $^3\text{H}$ -leucine incorporation. Na-K-ATPase activity was significantly reduced after 6 h. Protein content significantly dropped after 24 h. Second, electron microscope studies suggested that the mitochondrion is a target of fluoride ion toxicity, because mitochondrial alterations are observed at subcytotoxic levels. Crystals

appeared in these organelles at a concentration of fluoride ion (1 mM, 24 h) and after a short exposure (2 h, 5 mM), which did not affect cell viability or Na-K-ATPase activity.

Fluoride ion responsibility in the renal toxicity of halogenated agents has long been suspected. Both inorganic fluoride and oxalic acid have been proposed as nephrotoxins because they are liver metabolites of methoxyflurane, enflurane, and sevoflurane, but oxalic acid has been exonerated because the clinical syndromes after oxalic acid and halogenated agents are different, and oxalic acid particularly induces anuric renal failure. On the other hand, several studies concluded that the dose-related nephrotoxicity observed after administration of halogenated agents was principally due to their liver transformation into inorganic fluoride.<sup>3,7-10,23-25</sup> The severity of renal dysfunction is correlated to plasma fluoride concentration.<sup>1,12,15</sup> Moreover, renal histologic abnormalities are similar for both fluoride ions and methoxyflurane.<sup>1</sup> However, the precise cellular target of fluoride ions in the renal tubule remains a matter for debate. Polyuria after methoxyflurane, or fluoride ion infusion in experimental studies, is ADH-resistant.<sup>1,8,14</sup> These findings, combined with a normal free-water-clearance, suggest a defect in the ability of the collecting duct to respond to vasopressin<sup>8,11,12,14,15</sup> and, consequently, a decreased collecting duct permeability. Its association with a decreased medullary solute concentration cannot be explained except by an associated impairment of the ascending limb of the Henle's loop.<sup>8,11,12</sup>

Our study provides the first demonstration that fluoride ions damage collecting duct cells, as evaluated by an increase in LDH release and a decrease in cell number, protein content, and  $^3\text{H}$ -leucine incorporation in newly synthesized proteins after 6 h of exposure to a fluoride concentration of 5 mM. As for  $^3\text{H}$ -leucine incorporation, we first observed a slight, but significant increase at 1 mM, with no significant effect on the cell number or total protein content. The biphasic effect of fluoride has been observed in other cell activities: Soni *et al.* showed that low fluoride doses enhance aminopyrine *N*-demethylase, NADPH activity, and electron transport components, including cytochrome P450, whereas higher fluoride doses decrease these activities.<sup>26</sup>

In addition to nonspecific cell injury, exposure of human collecting duct cells to fluoride ions also induced major impairment of a pump known to be responsible for sodium transport across the cell, namely

Table 2. Number of Cells with Crystal Deposits According to Fluoride Concentration: 24 h Exposure

| Cells | Concentration (mM) |            |            |             |
|-------|--------------------|------------|------------|-------------|
|       | 0                  | 1          | 5          | 10          |
| n (%) | 0/72 (0)           | 16/67 (24) | 35/43 (81) | 70/70 (100) |

Table 3. Fluoride Toxicity

| Cell number (% of control) | Protein content (mg/well) | LDH activity (IU · l <sup>-1</sup> · min <sup>-1</sup> ) | $^3\text{H}$ -Leucine incorporation (cpm · min <sup>-1</sup> · mg protein <sup>-1</sup> ) | Na-K-ATPase (nmol · 5 min <sup>-1</sup> · mg <sup>-1</sup> ) |
|----------------------------|---------------------------|----------------------------------------------------------|-------------------------------------------------------------------------------------------|--------------------------------------------------------------|
| 100                        | 100                       | 100                                                      | 100                                                                                       | 100                                                          |
| 80                         | 80                        | 120                                                      | 80                                                                                        | 80                                                           |
| 60                         | 60                        | 140                                                      | 60                                                                                        | 60                                                           |
| 40                         | 40                        | 160                                                      | 40                                                                                        | 40                                                           |
| 20                         | 20                        | 180                                                      | 20                                                                                        | 20                                                           |

Values are mean  $\pm$  SD of three experiments. \*P < 0.05 versus control value.

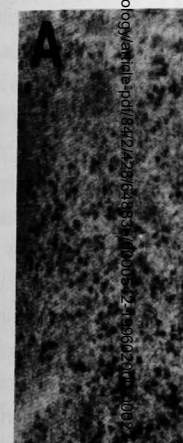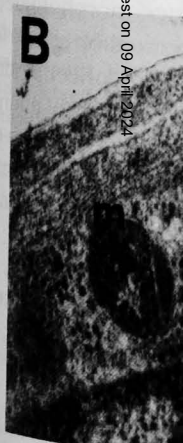

Fig. 2. Electron micrographs of human collecting duct cells grown in the presence of 5 mM fluoride ion for 2 h. (A) Normal appearance of a mitochondrion. (B) Crystal deposit (arrow) within a mitochondrion. Magnification: 5,000 $\times$ .

## FLUORIDE ION TOXICITY IN KIDNEY CELLS

Table 3. Fluoride Toxicity in Collecting Duct Cells: Time Effect

|                                                                                                                 | Time (h) (5 mM exposure) |             |             |              |
|-----------------------------------------------------------------------------------------------------------------|--------------------------|-------------|-------------|--------------|
|                                                                                                                 | 0                        | 2           | 6           | 24           |
| Cell number (% of control)                                                                                      | 100                      | 101 ± 16    | 87 ± 8*     | 77 ± 20*     |
| Protein content (mg/well)                                                                                       | 1.06 ± 0.14              | 1.07 ± 0.35 | 0.86 ± 0.13 | 0.70 ± 0.20* |
| LDH activity (IU · l <sup>-1</sup> )                                                                            | 53 ± 2                   | 54 ± 2      | 130 ± 33*   | 148 ± 25*    |
| <sup>3</sup> H-Leucine incorporation<br>(cpm · min <sup>-1</sup> · mg protein <sup>-1</sup> × 10 <sup>3</sup> ) | 60 ± 13                  | 57 ± 12     | 31 ± 10*    | 30 ± 7*      |
| Na-K-ATPase<br>(nmol · 5 min <sup>-1</sup> · mg <sup>-1</sup> )                                                 | 132 ± 29                 | 133 ± 27    | 106 ± 21*   | 61 ± 9*      |

Values are mean ± SD of three or four experiments performed in triplicate (n = 9 or 12).

\* *P* < 0.05 versus control values.

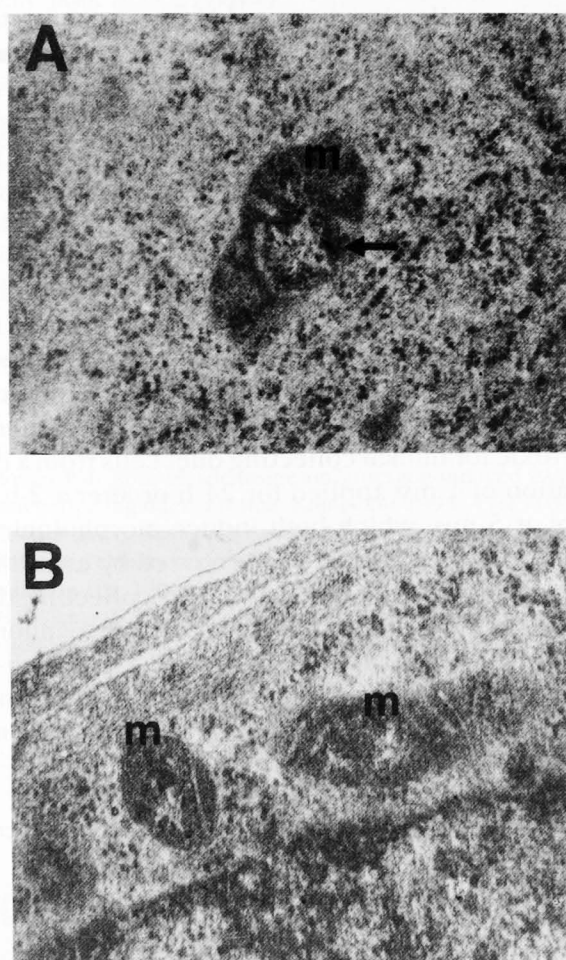

Fig. 2. Electron micrographs of mitochondria (m) in cells grown in the presence of 5 mM fluoride for 2 h. Note the crystal deposit (arrow) within one mitochondrion (A) and the abnormal appearance of two other mitochondria (B). Magnification 5,000×.

the basolateral Na-K-ATPase. Na-K-ATPase activity was impaired after only 6 h of exposure to 5 mM, as the other parameters of cell injury previously discussed.

In the current study, morphologic analysis showed mitochondrial abnormalities at a concentration of 1 mM applied for 24 h and after only 2 h of exposure at 5 mM. They suggest that this organelle may be a target for fluoride ion toxicity in human kidney cells. Mitochondria play a central role in providing energy to the cell, mainly as ATP molecules. Its impairment by fluoride could explain the fluoride-induced concentrating defect in two ways. First, although water reabsorption in the collecting duct is a passive phenomenon, it requires energy indirectly for the generation of cAMP stimulated by the binding of arginine-vasopressin to its receptor, the insertion of water channels into the apical membrane of the cell, and the subsequent trafficking of these channels to the basolateral domain in arginine-vasopressin stimulated cells. Second, sodium reabsorption is a secondarily active phenomenon, driven by the Na-K-ATPase pump, whose function requires ATP.

To assess the clinical relevance of our observations, several points should be addressed.

Table 4. Number of Cells with Crystal Deposits According to Time Exposure: 5 mM Fluoride Ion

| Cells | Time (h) |             |            |            |
|-------|----------|-------------|------------|------------|
|       | 0        | 2           | 6          | 24         |
| n (%) | 0/79 (0) | 14/109 (13) | 43/61 (70) | 35/43 (81) |



First, we acknowledge that exposing collecting duct cells to fluoride *in vitro* is not the same as administering fluoride-containing anesthetic agents *in vivo*. The aim of our experimental protocol was to investigate the mechanism of toxicity of fluoride ion, the major toxic metabolite of some halogenated agents.

Second, we tested fluoride concentrations between 1 and 10 mM. In clinical studies, plasma concentrations depend on the concentration and the anesthetic agent administered and on the duration of anesthesia.<sup>24,27,28</sup> The plasma toxicity threshold, established with methoxyflurane, usually is considered to be 50  $\mu\text{M}$ .<sup>24</sup> However, this threshold remains debatable, because a 25% reduction in maximum concentrating ability was observed in volunteers with a plasma fluoride concentration of less than 33  $\mu\text{M}$ .<sup>3</sup> On the other hand, the effect of fluoride appears to depend more on its intrarenal than plasma concentration. A significant increase in urine flow rate occurred in rats with a plasma fluoride concentration of only 32  $\mu\text{M}$ , but with a medullary concentration reaching 5.8 mM in the papilla and 2.1 mM in the outer medulla, after 1  $\mu\text{M}$  fluoride infusion for 3.5 h (*i.e.*, a total dose of 210  $\mu\text{mol}$ ).<sup>12</sup> These results indicate both a renal handling of fluoride and a gradient of this ion within the kidney.<sup>12</sup> Furthermore, a recent study suggested that renal metabolism of halogenated agents into fluoride exists, partly explaining the discrepancy between plasma values and renal toxicity.<sup>29</sup> This may explain why urinary fluoride concentrations in patients often are very high, even if plasma concentrations are relatively low.<sup>11,28</sup> The precise factors that determine the importance of the gradient between kidney and plasma fluoride concentrations remain unknown but probably include the duration and intensity of exposure. Therefore, we consider that the concentrations of fluoride tested in the current study may occur in the kidney during anesthesia with halogenated anesthetics.

Third, in the current study, the duration of exposure of the cells to fluoride was 2–24 h, which is the expected duration of anesthesia in most surgical procedures. Furthermore, prolonged fluoride elimination follows methoxyflurane, enflurane, and sevoflurane administration. Mazze *et al.* showed that plasma inorganic fluoride concentration peaked 6 h after the end of prolonged enflurane anesthesia in volunteers and that there were still detectable concentrations of fluoride in the urine 42 h later.<sup>3</sup> With sevoflurane, peak plasma fluoride concentration occurred at the 7th hour of anesthesia, and the highest

urinary concentration was observed during the first 24 h of the postoperative period.<sup>28</sup> Moreover, in the same study, on the 4th postoperative day, urine fluoride concentration was still 192  $\mu\text{M}$ . These data suggest that fluoride ions have sustained urine elimination after enflurane or sevoflurane anesthesia and that a few-hour exposure of the kidney cells is clinically relevant.

Fourth, despite the human origin of the cells under study and their morphologic, antigenic, and hormonal characteristics suggesting a high level of differentiation close to that of collecting duct principal cells *in vivo*, extrapolation of our results to clinical situations may be controversial. In particular, the source of cells is the cortical collecting duct, which is exposed to lower concentrations of fluoride because of its cortical situation. On the other hand, it cannot be ruled out that the *in vitro* collecting duct could be more susceptible to toxins than the *in vivo* collecting duct. However, it must be stressed that our morphologic observations are in keeping with those of Mazze *et al.*,<sup>8,30</sup> who observed mitochondrial swelling and degeneration after prolonged methoxyflurane anesthesia in rats. It is worth noting that cultures of renal proximal-tubule cells have been instrumental in unraveling the mechanisms of drug-induced nephrotoxicity.<sup>31</sup> Our culture of human collecting duct cells could represent a reproducible and reliable model system for studying the metabolic effect of fluoride ion and the mechanism of its toxicity.

In conclusion, our study demonstrates that fluoride ion is toxic for human collecting duct cells from a concentration of 1 mM applied for 24 h or after a 2-h exposure at 5 mM, which both induce morphologic alterations of mitochondria characterized by crystal formation. We conclude that, in human collecting duct cells, this cellular organelle could be a target of fluoride toxicity. We suggest that the ensuing lack of high-energy phosphates is partly responsible for the urinary concentrating defect occurring after administration of biotransformed inhaled anesthetics.

The authors thank B. Riou, for advice and reading the manuscript.

## References

1. Cousins MJ, Mazze RI, Kosek JC, Hitt BA, Love FV: The etiology of methoxyflurane nephrotoxicity. *J Pharmacol Exp Ther* 1974; 190: 530–41
2. Frink EJ, Malan TP, Isner RJ, Brown EA, Morgan SE, Brown BR: Renal concentrating function with prolonged sevoflurane or enflurane anesthesia in volunteers. *ANESTHESIOLOGY* 1994; 80:1019–25

3. Mazze RI, Calverley rotoxicity: Prolonged enflurane. *ANESTHESIOLOGY* 1974; 42:1019–25
4. Mazze RI, Shue GL, with methoxyflurane anes evaluation. *JAMA* 1971; 225:1019–25
5. Malan TP, Katoda Y, after sevoflurane or enflurane. *Analg* 1993; 77:81–21
6. Barr GA, Cousins MJ, of the renal effects and me in Fischer 344 rats. *J Phar*
7. Mazze RI, Trudell JL, and renal dysfunction: Cl 1971; 35:247–52
8. Mazze RI, Cousins M, nephrotoxicity in rats: A *ANESTHESIOLOGY* 1972; 36:1019–25
9. Taves DR, Frink BW, methoxyflurane anesthe toxicity. *JAMA* 1970; 214:1019–25
10. Cousins MJ, Green, renal effects of enflurane
11. Roman RJ, Carter, sites of action of fluoride 46:260–4
12. Whitford GM, Tave, sue solute concentrations correlates in the rat. *ANES*
13. Orloff J, Handler JS, hormone. *Am J Med* 1966; 41:1019–25
14. Wallin JD, Kaplan E, and diluting ability in the
15. Frascino JA, Effect, trating mechanism. *Possi* 1972; 79:192–200
16. Prié D, Friedlander R, Ronco PM: Role of a human collecting duct c
17. Saint-Ruf C, Gardeu R: Molecular cloning and from human HBL-100 cell
18. Wicker R, Agramea, labelled antibodies. *J Ge*

## FLUORIDE ION TOXICITY IN KIDNEY CELLS

3. Mazze RI, Calverley RK, Smith NT: Inorganic fluoride nephrotoxicity: Prolonged enflurane and halothane anesthesia in volunteers. *ANESTHESIOLOGY* 1977; 46:265-71
4. Mazze RI, Shue GL, Jackson SH: Renal dysfunction associated with methoxyflurane anesthesia: A randomized, prospective clinical evaluation. *JAMA* 1971; 216:278-88
5. Malan TP, Katoda Y, Mata H, Frink EJ, Brown BR: Renal function after sevoflurane or enflurane anesthesia in the Fisher 344 rat. *Anesth Analg* 1993; 77:817-21
6. Barr GA, Cousins MJ, Mazze RI, Hitt BA, Kosek JC: A comparison of the renal effects and metabolism of enflurane and methoxyflurane in Fischer 344 rats. *J Pharmacol Exp Ther* 1974; 188:257-64
7. Mazze RI, Trudell JR, Cousins MJ: Methoxyflurane metabolism and renal dysfunction: Clinical correlation in man. *ANESTHESIOLOGY* 1971; 35:247-52
8. Mazze RI, Cousins MJ, Kosek JC: Dose-related methoxyflurane nephrotoxicity in rats: A biochemical and pathologic correlation. *ANESTHESIOLOGY* 1972; 36:571-87
9. Taves DR, Fry BW, Freeman RB, Gillies AJ: Toxicity following methoxyflurane anesthesia: II. Fluoride concentrations in nephrotoxicity. *JAMA* 1970; 214:91-5
10. Cousins MJ, Greenstein LR, Hitt BA, Mazze RI: Metabolism and renal effects of enflurane in man. *ANESTHESIOLOGY* 1976; 44:44-53
11. Roman RJ, Carter JR, North WC, Kauker ML: Renal tubular sites of action of fluoride in Fischer 344 rats. *ANESTHESIOLOGY* 1977; 46:260-4
12. Whitford GM, Taves DR: Fluoride-induced diuresis: Renal-tissue solute concentrations, functional, hemodynamic, and histologic correlates in the rat. *ANESTHESIOLOGY* 1973; 39:416-27
13. Orloff J, Handler JS: The cellular mode of action of antidiuretic hormone. *Am J Med* 1964; 36:686-97
14. Wallin JD, Kaplan RA: Effect of sodium fluoride on concentrating and diluting ability in the rat. *Am J Physiol* 1977; 232:F335-40
15. Frascino JA: Effect of inorganic fluoride on the renal concentrating mechanism: Possible nephrotoxicity in man. *J Lab Clin Med* 1972; 79:192-203
16. Prié D, Friedlander G, Coureau C, Vandewalle A, Cassingena R, Ronco PM: Role of adenosine on glucagon-induced cAMP in a human collecting duct cell line. *Kidney Int* 1995; 47:1310-8
17. Saint-Ruf C, Nardeux P, Cebrian J, Lacasa M, Lavialle C, Cassingena R: Molecular cloning and characterization of endogenous SV40 DNA from human HBL-100 cells. *Int J Cancer* 1989; 44:367-72
18. Wicker R, Avrameas S: Localization of virus antigens by enzyme-labelled antibodies. *J Gen Virol* 1969; 4:465-71
19. Green CE, Dabbs JE, Tyson CA, Rauckman EJ: Stress initiated during isolation of rat renal proximal tubules limits in vitro survival. *Ren Fail* 1990; 12:147-56
20. Martinez-Maldonado M, Allen JC, Eknayan GE, Suki W, Schwartz A: Renal concentrating mechanism: Possible role for sodium-potassium-activated triphosphatase. *Science* 1969; 165:807-8
21. Torretti J, Hendler E, Weinstein E, Longnecker RE, Epstein FH: Functional significance of Na-K-ATPase in the kidney: Effects of ouabain inhibition. *Am J Physiol* 1972; 222:1398-405
22. Vuillemin T, Teulon J, Geniteau-Legendre M, Baudouin B, Estrade S, Cassingena R, Ronco PM, Vandewalle A: Regulation by calcitonin of Na<sup>+</sup>-K<sup>+</sup>-Cl<sup>-</sup> cotransport in a thick ascending limb cell line. *Am J Physiol* 1992; 263:C563-72
23. Kosek JC, Mazze RI, Cousins MJ: The morphology and pathogenesis of nephrotoxicity following methoxyflurane anesthesia: An experimental model in rats. *Lab Invest* 1972; 27:575-80
24. Cousins MJ, Mazze RI: Methoxyflurane nephrotoxicity: A study of dose response in man. *JAMA* 1973; 225:1611-6
25. Whitford GM, Taves DR: Fluoride-induced diuresis: Plasma concentrations in the rat. *Proc Soc Exp Biol Med* 1971; 137:458-60
26. Soni MG, Kachole MS, Pawar SS: Alterations in drug metabolising enzymes and lipid peroxidation in different rat tissues by fluoride. *Toxicol Lett* 1984; 21:167-72
27. Frink EJ, Ghantous H, Malan TP, Morgan S, Fernando J, Gandolfi AJ, Brown BR: Plasma inorganic fluoride with sevoflurane anesthesia: Correlation with indices of hepatic and renal function. *Anesth Analg* 1992; 74:231-5
28. Kobayashi Y, Ochiai R, Takeda J, Sekiguchi H, Fukushima K: Serum and urinary inorganic fluoride concentrations after prolonged inhalation of sevoflurane in humans. *Anesth Analg* 1992; 74:753-7
29. Kharasch ED, Hankins DC, Thummel KE: Human kidney methoxyflurane and sevoflurane metabolism: Intrarenal fluoride production as a possible mechanism of methoxyflurane toxicity. *ANESTHESIOLOGY* 1995; 82:689-99
30. Mazze RI, Cousins MJ, Kosek JC: Strain differences in metabolism and susceptibility to the nephrotoxic effects of methoxyflurane in rats. *J Pharmacol Exp Ther* 1973; 184:481-8
31. Blais A, Morvan-Baleynaud J, Friedlander G, Le Grimellec: A culture of rabbit proximal tubules as a cellular model to study nephrotoxicity of xenobiotics. *Kidney Int* 1993; 44:13-8
